## A new *Drosophila* homeobox gene, *bsh*, is expressed in a subset of brain cells during embryogenesis

Bradley Jones<sup>1</sup> and William McGinnis<sup>1,2</sup>

Departments of Biology<sup>1</sup> and Molecular Biophysics and Biochemistry<sup>2</sup>, Yale University, New Haven, CT 06511, USA

### SUMMARY

Homeobox genes have been shown to control the determination of positional, tissue and cellular identity during the development of the fruitfly *Drosophila melanogaster*. Because genes involved in the determination of internal structures derived from neural, mesodermal and endodermal tissues may have been overlooked in conventional genetic screens, we undertook the identification of new homeobox genes expressed in these internal tissues. Here we describe the characterization of one of these new *Drosophila* homeobox genes, called *brain-specific-homeobox* (*bsh*). In embryos, *bsh* is expressed exclusively in the brain. *bsh* protein accumu-

lates in approximately 30 cells in each brain hemisphere. One of these *bsh* expressing cells is closely associated with the terminus of the larval visual nerve (Bolwig's nerve). While deletions of chromosomal interval containing the *bsh* gene show no dramatic changes in embryonic brain morphology, the expression pattern of the *bsh* gene suggests that it may play a highly specialized role in the determination and function of cell type in the *Drosophila* brain.

Key words: homeobox, brain, central nervous system, Bolwig's nerve, *Drosophila*

### INTRODUCTION

As in other metazoans, early events during the embryogenesis of the fruitfly *Drosophila melanogaster* direct cells into developmental pathways by position-specific determinative mechanisms. Through systematic genetic screens for mutants that alter the normal pattern of the cuticle of the *Drosophila* larva, many of the genes directing these events have been identified (Lewis, 1978; Kaufman et al., 1980; Nüsslein-Volhard and Wieschaus, 1980; Nüsslein-Volhard et al., 1984; Jürgens et al., 1984; Wieschaus et al., 1984). The discovery of these early patterning genes has opened the study of development to the increasingly sophisticated techniques of molecular biology, and over the last decade has led to an outline of the genetic mechanisms underlying early pattern formation in the *Drosophila* embryo (reviewed by Akam, 1987; Small and Levine, 1991; St. Johnston and Nüsslein-Volhard, 1992; Ingham and Martinez Arias, 1992).

A surprising discovery that emerged from these and subsequent studies was that a large number of early *Drosophila* patterning genes contain a highly conserved 180 bp sequence called the homeobox (reviewed by Scott et al., 1989; Dessain and McGinnis, 1992). Among them are the homeobox genes of the Antennapedia and Bithorax complexes (collectively called the HOM-C) which control segmental identity along the anterior-posterior axis; HOM-C genes have highly conserved vertebrate counterparts (the Hox genes), implicating conserved mechanisms of axial pattern formation in both insects and vertebrates (reviewed

by McGinnis and Krumlauf, 1992). More diverged homeobox genes have been found in a wide variety of organisms as well as *Drosophila* and many have been implicated in the determination of positional, tissue and cellular identity.

The 60 amino acid homeodomain encoded by the homeobox motif has a helix-turn-helix structure similar to prokaryotic transcription regulators (Laughon and Scott, 1984; Otting et al., 1990; Kissinger et al., 1990). This domain mediates sequence specific DNA binding (Desplan et al., 1988; Hoey and Levine, 1988; Beachy et al., 1988; Affolter et al., 1990; Ekker et al., 1991; Dessain et al., 1992), and is very important for the biological specificity of the protein (Kuziora and McGinnis, 1989, 1991; Mann and Hogness, 1990; Gibson et al., 1990). It is thought that the products of homeobox genes control specific programs of development through the transcriptional regulation of target genes via the target specificity of the homeodomain. Thus, the differential expression of homeobox genes in different cells would result in a characteristic program of target gene expression which ultimately contributes to the determination of the position, morphology, and function of each cell in the animal.

The original genetic screens for *Drosophila* mutants with altered larval or adult cuticle patterns identified many homeobox genes involved in the development and organization of the epidermis. Some of these genes have since been found to have additional roles in the development of internal structures and germ layers. For example, besides specifying regional identity in the epidermis, HOM-C genes

are also involved in the specification of neuronal and mesodermal cell fates (Lewis, 1978; Hooper, 1986; Doe and Scott, 1988; Heuer and Kaufman, 1992; Immerglück et al., 1990; Reuter et al., 1990). The homeobox genes *fushi tarazu* (*ftz*) and *even-skipped* (*eve*), which have early functions in setting up the segmental pattern of the blastoderm, are also required for the specification of subsets of neurons in the central nervous system (CNS; Doe et al., 1988a,b). The *cut* gene and the homeobox genes at the *Bar* locus, originally identified for their effects on adult structures, have been shown to be involved in the determination of sensory organ identities in the embryo (Bodmer et al., 1987; Blochlinger et al., 1991; Higashijima et al., 1992a,b). Both *gooseberry* (Patel et al., 1989) and *orthodenticle* (Finkelshtein et al., 1990) have been shown to have neural functions in addition to their epidermal functions, and most of the homeobox segmentation genes have a second phase of expression in different subsets of cells in the CNS, suggesting their involvement in neuronal cell lineage determination and differentiation events.

A number of homeobox genes in the nematode *Caenorhabditis elegans* are involved in specifying cell lineages and cell types in the nervous system. *mec-3* is required for the correct determination of touch receptor neurons (Way and Chalfie, 1988); *unc-86*, one of the POU class of homeobox genes, is required for the determination of a number of neuroblast lineages (Finney et al., 1988); and *unc-4* determines the pattern of synaptic input to specific motor-neurons (Miller et al., 1992).

Because many *Drosophila* genes dedicated to the determination of internal structures derived from neural, mesodermal and endodermal tissues may have little effect on the development of the larval cuticle, a significant number of important genes have probably been missed in conventional mutant screens. A 'reverse genetic' approach has been taken by many labs to identify such genes either by using the enhancer trap method (O'Kane and Gehring, 1987) screening for genes with tissue or cell-specific patterns of expression, or alternatively by cloning new genes homologous to members of gene families that have been strongly associated with developmental processes. Based on the hypothesis that more diverged members of the homeobox gene family remained to be discovered in *Drosophila* and that these genes may provide novel genetic functions in pattern formation and morphogenesis, screens have been undertaken to identify new members of the homeobox gene family using sequence homology (Levine et al., 1985; Macdonald and Struhl, 1986; Macdonald et al., 1986; Barad et al., 1988; Dalton et al., 1989; Kim and Nirenberg 1989; Billin et al., 1991; Treacy et al., 1991; Dessain and McGinnis, 1993). A number of homeobox genes have been isolated with novel expression patterns restricted to internal structures. Four are expressed in mesodermal cell lineages (*H2.0*, Barad et al., 1988; *S59*, Dorhmann et al., 1990; *msh*, Gehring, 1987; and *msh-2*, Bodmer et al., 1990); others have complex patterns, but are primarily expressed in the central nervous system (*zfh1* and 2, Fortini et al., 1991, Lai et al., 1991; *prospero*, Doe et al., 1991, Vaessin et al., 1991; *Cfl-a*, Johnson and Hirsch, 1990; *I-POU*, Treacy et al., 1991; *pdm-2*, Billin et al., 1991; *57San*, *66Dem*, *90Bre*, *93Bal*, *94Che*, Dessain and McGinnis, 1993).

This paper describes a new *Drosophila* homeobox gene, called *brain-specific-homeobox* (*bsh*). *bsh* is the first known homeobox gene that is expressed exclusively in the developing brain. One of the *bsh*-expressing brain cells is closely associated with the terminus of the larval photoreceptor nerve (Bolwig's nerve). While deletions of the chromosomal interval containing the *bsh* gene show no dramatic changes in the morphology of the embryonic brain, the unique expression pattern of *bsh* protein in approximately 30 cells in each brain hemisphere suggests that *bsh* may play a role in the determination and function of cell types in the *Drosophila* brain.

## MATERIALS AND METHODS

### Library screens for genomic and cDNA clones

Phage clones that overlap the original *bsh* homeobox-containing clone E86 (Dalton et al. 1989) were isolated from a library provided by A. Preiss (Preiss et al., 1985) consisting of partially digested *Sau3A* fragments of genomic *Drosophila melanogaster* DNA cloned into *Bam*HI digested EMBL4 arms. Cosmid clones were isolated from a CoSpeR library containing *Sau3A* digested *Drosophila* genomic DNA which was constructed and kindly provided by J. Tamkun. Homeobox fragments were mapped in E86 using reduced stringency Southern hybridization conditions as described in McGinnis et al. (1984a). cDNAs were isolated from libraries which were a generous gift from L. Kauvar and T. Kornberg (Poole et al., 1985). One *bsh* cDNA (cE86A) was isolated from a *Drosophila* gt10 cDNA library derived from 3- to 12-hour-embryonic poly(A)<sup>+</sup> RNA (Kauvar's E6 library); a second cDNA (cE86C) was isolated from a library derived from late-third-instar poly(A)<sup>+</sup> RNA (Kauvar's I4 library). Exons were mapped onto genomic clones using high stringency hybridization conditions as described by McGinnis et al. (1984a).

### In situ hybridization to polytene chromosomes

Preparation and hybridization to chromosomes was performed as described in Langer-Safer et al. (1982). DNA probes were labeled with biotin using the random-priming method of Feinberg and Vogelstein (1983). Enzymatic detection of biotinylated probes was done using a streptavidin/horseradish peroxidase conjugate (ENZO Biochemicals), followed by staining with diaminobenzidine.

### RNA extraction and northern analysis

RNA extraction, electrophoresis, blotting, hybridization and washes were performed as previously described (Kuziora and McGinnis, 1988). A 1.8 kb *Eco*RI-*Sal*I genomic fragment from E86 containing the *bsh* homeobox exon was used as a probe. Transcript size was estimated by running a lane with *Hind*III digested DNA as described in Maniatis et al. (1982).

### In situ hybridization to tissue sections

Third instar larvae were frozen in Tissue-Tek (Miles Scientific) and cut into 8 µm sections which were placed on poly-lysine coated slides. After drying out on a hot plate at 45°C for 15 minutes, the slides were submerged in 4% paraformaldehyde/PBS for 20 minutes, rinsed in PBS and dehydrated through an ethanol series. The slides were then treated with pronase, acetylated and probed as described in Chadwick and McGinnis (1987). The probe used was a <sup>35</sup>S-labeled riboprobe synthesized from a pBluescript (Stratagene) clone containing the 1.8 kb *Eco*RI-*Sal*I genomic *bsh* homeobox exon fragment.

## Sequencing

Overlapping restriction fragments of E86 and the two *bsh* cDNAs, cE86A and cE86C, were subcloned in both orientations into M13 mp18 and mp19 (Messing, 1983), which were then used as single stranded templates for sequencing. Sequencing was performed by the dideoxynucleotide method (Sanger et al., 1977) using the protocol, reagents and a modified form of T7 polymerase from the 'Sequenase' kit of US Biochemicals. Both strands of cE86A and cE86C, and 2.6 kb of genomic DNA encompassing the *bsh* transcription unit were sequenced in their entirety.

## Primer extension

Primer extension experiments were performed as described in Ausubel et al. (1987). An oligonucleotide primer was prepared that is complimentary to sequences 70-100 nucleotides from the 5' end of cE86C (see Fig. 5). The primer was end-labeled with [<sup>32</sup>P]ATP (6000 Ci/mmol) using T4 polynucleotide kinase. Three ammonium acetate precipitations were performed to remove most of the unincorporated counts. Approximately 5×10<sup>4</sup> cts/minute of labeled primer was annealed to 10 µg of poly(A)<sup>+</sup> RNA derived from 12- to 24-hour embryos, and hybridized overnight in hybridization buffer (80% formamide, 40 mM Pipes pH 6.6, 400 mM NaCl, 1 mM EDTA pH 8) at 30°C after heating the mixture to 65°C. Extension of the primer was carried out at 42°C for 90 minutes using AMV reverse transcriptase, and the products were analyzed by autoradiography after running through a 5% polyacrylamide/8 M urea sequencing gel.

## Preparation of bsh fusion protein and anti-bsh antiserum

The T7 expression system of Studier and Moffatt (1986) was used to produce bsh fusion protein in *E. coli*. A *Bam*HI fragment from the *bsh* cDNA cE86A containing the final two thirds of the *bsh* ORF was cloned into the *Bam*HI site of the expression vector pAR3039. The resulting plasmid, designated pAR E86B, has a T7 promoter in front of the codons for the first 13 amino acids of T7 gene 10, followed by the codons for 136 amino acids of the *bsh* ORF. The expression plasmid pAR E86B was transformed into the *E. coli* strain BL21(DE3)pLysS which contains a T7 RNA polymerase gene under the control of the *lac* promoter (Studier and Moffatt, 1986). After induction with isopropyl-*D*-thiogalactopyranoside (IPTG; Sigma), amounts in the range of 10-20 mg/l of bsh fusion protein were obtained. Approximately 250 µg of fusion protein was cut out of an SDS-polyacrylamide gel, frozen, ground to a powder, resuspended in PBS and homogenized with an equal volume of Freund's complete adjuvant. This homogenate was injected into a New Zealand white rabbit at multiple subcutaneous sites. The rabbit was boosted after 6 weeks with 100 µg of bsh fusion protein which had been electroeluted from the SDS-polyacrylamide gel, precipitated with acetone, resuspended in PBS and mixed with Freund's incomplete adjuvant. After 8 weeks, the rabbit was bled, yielding serum that specifically interacted with bsh protein.

## Immunohistochemical detection of proteins in embryos

*Drosophila* embryos were prepared and stained using HRP immunohistochemistry as described previously (Jack et al., 1988). Anti-bsh protein antiserum, which had been diluted 1:20 in PBS, was immunoabsorbed with fixed devitelinized 0- to 2-hour embryos and then used at a final dilution of 1:1000 to stain whole embryos. Goat anti-rabbit IgG antibodies conjugated to biotin (Jackson Immunoresearch) were used as the secondary antibodies followed by HRP detection with Vector Labs's ABC system with diaminobenzidine (DAB). To study the pattern of the developing nervous system in relation to the bsh pattern in both wild-type,

deficiency, and mutant embryos, we double stained embryos with anti-bsh antiserum and a variety of antibodies that visualize components of the nervous system. The following antibodies were used. (1) Anti-horseradish peroxidase (anti-HRP) antibody recognizes a neural-specific carbohydrate moiety expressed on the surface of all neurons and axons (Jan and Jan, 1982; Snow et al., 1987); we used goat anti-HRP (Cappel) at a dilution of 1:1000, followed by donkey anti-goat IgG conjugated to biotin at 1:500 (Jackson Immunoresearch) and HRP detection. (2) mAb22C10 (Fujita et al., 1982; Zipursky et al., 1984), which recognizes a cytoplasmic antigen in all the PNS neurons as well as a subset of neurons in the CNS, was used at a 1:50 dilution. (3) mAbBP102, which strongly stains the axons of the CNS with virtually no staining of neuron cell bodies and is an excellent marker for the pattern of commissures and connectives in the ventral cord and the brain (Elkins et al., 1990), was used at a 1:5 dilution. (4) mAb2D5, which recognizes the fasciclin III protein (Patel et al., 1987) and stains the membranes of a subset of neurons and axons in the CNS, as well as ectodermal and endodermal cells, was used at a 1:5 dilution. (5) mAbBP104, which recognizes a nervous system specific form of neuroglian (Hortsch et al., 1990) and stains the membranes of all neurons of the CNS and PNS, was used at a 1:5 dilution. The monoclonal antibodies used above were detected by a goat anti-mouse Ig antibody conjugated to biotin (Jackson Immunoresearch) followed by peroxidase labeling with the ABC kit and DAB staining. In all double staining experiments both anti-bsh antiserum and the co-labeling antibody were stained with DAB; bsh protein expressing cells are easily identified by their strong nuclear staining. Embryos were cleared in methyl salicylate and mounted in Permount (Fisher).

## Digital optical microscopy

The high resolution composite image of the Bolwig's nerve (Fig. 8C) was taken using computer enhanced digital microscopy as described in Johansen et al. (1989). The composite image was made by tableting the in-focus areas of multiple averaged video-images taken at different focal plains. The image was photographed directly from a high-resolution video monitor using Kodak T-MAX 100 film.

## P element construction and transformation

The P element vector pbs-bshCaSpeR was constructed using the heat shock shuttle vector pHSBJ (Malicki et al., 1990; Jones and McGinnis, 1993). pHSBJ contains a polylinker located between *hsp70* promoter sequences and 3 untranslated sequences of the *Adh* gene. The *bsh* cDNA cE86C was inserted into the *Eco*RI site in the polylinker of pHSBJ, and the resulting *bsh* heat shock cassette was excised with *Not*I and subcloned into the *Drosophila* transformation vector CaSpeR (Pirota et al., 1988; see Fig. 9A). CaSpeR contains P element termini flanking both the polylinker and a functional copy of the *white* (*w*) gene.

To obtain transgenic lines, pbs-bshCaSpeR was coinjected with the helper plasmid p 25.7wc (Karess and Rubin, 1984) into *Df(1)w, yw<sup>67c23(2)</sup>* embryos as described by Rubin and Spradling (1982) and selected for rescue of the *w* phenotype. A single viable insert on the X chromosome designated *P[hsp70-bsh w<sup>+</sup>]<sup>A</sup>* was generated. Four additional strains, *P[hsp70-bsh w<sup>+</sup>]<sup>B</sup>* and *P[hsp70-bsh w<sup>+</sup>]<sup>C</sup>* on the second chromosome, and *P[hsp70-bsh w<sup>+</sup>]<sup>D</sup>* and *P[hsp70-bsh w<sup>+</sup>]<sup>E</sup>* on the third chromosome, were generated by transposition of *P[hsp70-bsh w<sup>+</sup>]* using a genomic source of transposase (Robertson et al., 1988).

## Fly strains

Fly culture and crosses were performed according to standard procedures. The wild-type stock was Oregon R. The deficiency strains *Df(2L)TW65*, *Df(2L)TW161*, and *Df(2L)E55* (Wright et al., 1976a)

were obtained from the Bowling Green Stock Center. *Df(2L)pr65* was a gift of B. Ganetzky (Brittacher and Ganetzky, 1983) and *Df(2L)OD16* (Lindsley and Zimm, 1992) was donated by T. Wright. The mutants *l(2)37Fe* and *l(2)37Ff* (also called *l(2)E3* and *l(2)E43* respectively; Wright et al., 1976b) were obtained from the Bowling Green stock center, and *l(2)37Fg* (also called *l(2)09*; Lindsley and Zimm, 1992) was obtained from T. Wright. The *screw* allele *scw<sup>ST2</sup>* and the *spitz* allele *spi<sup>HM105</sup>* were a gift of C. Nüsslein-Volhard, the *glass* allele *gl<sup>2</sup>* was obtained from D. Kankel, and the strain used for P element transformations, *Df(1)w, yw<sup>67c23(2)</sup>*, was obtained from V. Pirotta.

## RESULTS

### Isolation and molecular organization of the *bsh* gene

The *bsh* homeobox containing clone E86 was previously isolated by Dalton et al. (1989; the *bsh* homeobox was originally called E86) in a screen of a *Drosophila* genomic library for sequences that cross-hybridize with the *even-skipped* (*eve*) homeobox under low stringency conditions. In situ hybridization to polytene chromosomes places E86 at 38A1-3 on the left arm of the second chromosome (Dalton et al., 1989). We have isolated additional genomic clones X3, K1, and cosE86-12, that flank and overlap E86, and which together include approximately 46 kb of contiguous genomic DNA (Fig. 1A).

To facilitate the genetic analysis of the *bsh* gene, which will be described later, a more detailed cytogenetic localization of the *bsh* genomic region was performed. Several deficiency chromosomes with breakpoints in the 38A region were tested for the presence or absence of the four genomic clones on the deleted region of the chromatid in polytene preparations. A summary of this analysis is shown in Fig. 2A. The entire 46 kb genomic region is contained within a small deficiency *Df(2L)OD16* (Lindsley and Zimm, 1992) which deletes the strong band at the beginning of 38A. The genomic region can be further delimited by its deletion in *Df(2L)TW65* (Wright et al., 1976a) whose proximal breakpoint is at 38A1, and its partial deletion in *Df(2L)pr65* (Brittacher and Ganetzky, 1983) whose proximal breakpoint at 38A3 breaks within the DNA region where E86 and K1 overlap (see also Fig. 1A). The mapping of the *Df(2L)pr65* breakpoint to the overlapping DNA of E86 and K1 has allowed us to orient the molecular map along the chromosome with respect to the centromere (Fig. 1A).

The *bsh* homeobox was mapped by low stringency Southern hybridization with the *eve* homeobox probe (Dalton et al., 1989) to a 1 kb *Bam*HI-*Sal*I fragment near the center of E86 (Fig. 1B). This fragment was sequenced and shown to contain the 180 nucleotide homeobox sequence in an apparent 296 nucleotide exon flanked by consensus splice donor and acceptor sequences (Mount, 1982). To determine the number and size of transcripts containing the *bsh* homeobox we probed an all stage northern blot (Fig. 3A). A single rare 2 kb transcript was detected throughout development beginning after six hours, with highest levels occurring between 6 and 24 hours of embryogenesis. The spatial distribution of *bsh* transcript expression was initially determined by in situ hybridization with <sup>35</sup>S-labeled anti-sense RNA probes to tissue sections of

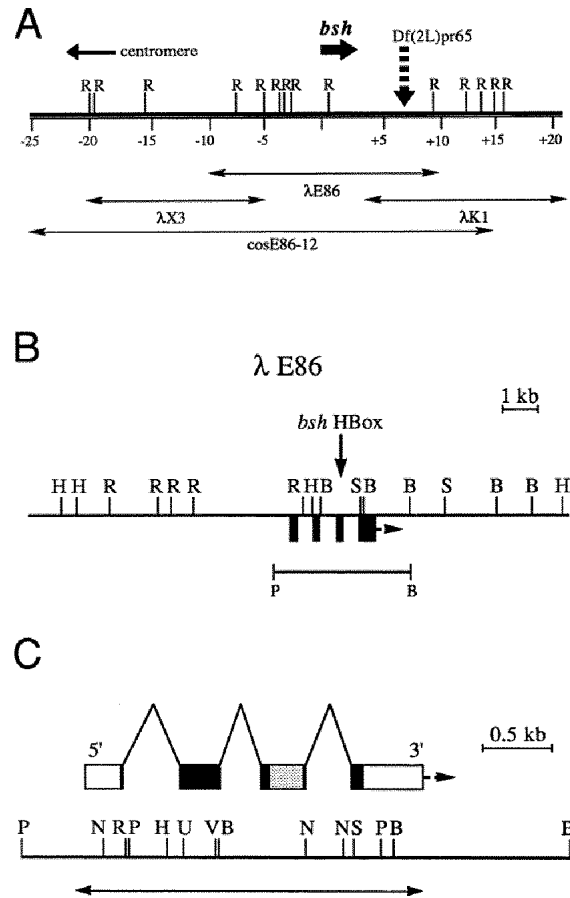

**Fig. 1.** Molecular organization of the *bsh* locus. (A) Molecular map of the *bsh* genomic region derived from four overlapping clones E86, X3, K1 and cosE86-12 which are diagrammed below the restriction map. Restriction sites of *Eco*RI (R) are depicted as well as distances in kilobases from the predicted transcription start site of the *bsh* gene. The breakpoint of *Df(2L)pr65* maps to the overlap of E86 and K1 (dashed arrow). (B) Molecular map of the genomic clone E86. The location of the *bsh* homeobox is indicated. Black boxes indicate the positions of *bsh* exons. The line below the map bounded by P and B (for *Pst*I and *Bam*HI) shows the region that is expanded in C. (C) Molecular map of the *bsh* transcription unit. The boxes indicate the position of exons, the unshaded parts indicate untranslated 5' and 3' regions, the black indicates the open reading frame, and the shaded box indicates the position of the homeobox. The arrow below the map shows the sequenced region (2672 base pairs) that is depicted in figure 5. Restriction enzymes: *Bam*HI (B); *Hind*III (H); *Nae*I (N); *Pst*I (P); *Eco*RI (R); *Sal*I (S); *Nru*I (U); and, *Eco*RV (V).

embryos, 3rd instar larvae, and adults. *bsh* transcripts can first be detected in very discrete patches in the procephalic lobe in stage 12 embryos (Campos-Ortega and Hartenstein, 1985) and transcripts are subsequently restricted to the brain lobes throughout embryonic development. A detailed description of the embryonic expression of *bsh* protein follows later in this paper. In 3rd instar larvae (Fig. 4A,B), transcripts are restricted to the developing optic lobes in cells that have just arisen from the inner and outer proliferation centers (Kankel et al., 1980). Later, adults show

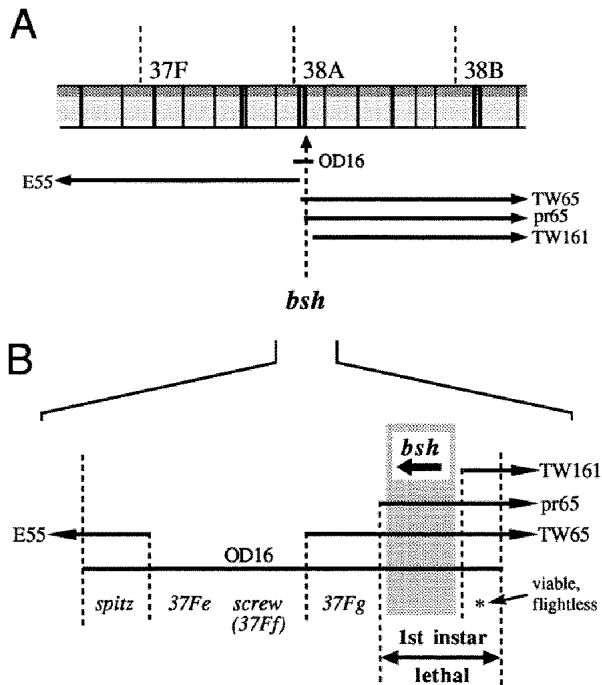

**Fig. 2.** Cytogenetic and complementation maps of the 38A chromosomal region. (A) Cytogenetic representation of the salivary gland chromosome region around 38A showing the location of *bsh* clones (dashed arrow) with respect to deficiency breakpoints. The chromosomal regions deleted by each deficiency are depicted by horizontal bars with arrows beneath the diagram of the polytene chromosome. *bsh* hybridizes to the strong bands at the beginning of 38A (38A1-3) and is deleted by *Df(2L)OD16*, *Df(2L)TW65* and *Df(2L)pr65*. (B) Complementation map of the *bsh* region. Deficiency breakpoints (dashed vertical lines) are ordered with respect to the ability of each deficiency (horizontal bars) to complement known lethal mutant alleles (in italics, described more fully in Materials and methods). In situ hybridization places the *bsh* transcription unit between the breakpoints of *Df(2L)pr65* and *Df(2L)TW161* (shaded region) eliminating the possibility that *bsh* corresponds to one of these lethals. The smallest deletion interval that eliminates *bsh* (the overlap of *Df(2L)OD16* and *Df(2L)pr65*) produces a first instar larval lethal phenotype.

very low levels of labeling over the cell body layer of the first optic ganglia (the lamina; data not shown). In both the larva and adult there is no significant labeling above background levels outside of the brain hemispheres. While we were able to detect *bsh* transcripts in the larval and adult brain, we have not obtained convincing staining of *bsh* protein using anti-*bsh* antiserum in the larva or adult, which is apparently due to the very low levels of *bsh* protein expression during these stages.

Based on the northern and in situ analysis we expected that copies of *bsh* messenger RNAs would not be abundantly represented in cDNA libraries. We used a 0.6 kb *Bam*HI-*Nae*I fragment containing the entire homeobox exon to screen three embryonic cDNA libraries constructed by L. Kauvar (Poole et al., 1985). From an estimated 1,000,000 cDNA clones we were able to isolate a single cDNA with an insert of 1.1 kb (designated cE86A). This

cDNA was then used to screen through additional libraries; one more cDNA was isolated from a late 3rd instar library with an insert of 1.2 kb (designated cE86C). cE86C differs from cE86A by being 0.2 kb longer on its 5' end and 0.1 kb shorter on its 3' end. Hybridization of the two *bsh* cDNAs to genomic clones placed exonic sequences in the center of E86 (Fig. 1B,C).

In order to determine accurately the structure of the locus, the entire 2.6 kb genomic region encompassing the four *bsh* exons (Fig. 1C) and the two *bsh* cDNAs (cE86A and cE86C) were sequenced using single-stranded dideoxynucleotide sequencing (Fig. 5). Aligning the cE86C sequence with the genomic sequence indicates the presence of three introns, all of which are flanked with excellent matches of consensus donor and splice acceptor sequences (Mount, 1982). The 5' end of cE86A starts 18 nucleotides 5' of the acceptor site of the second exon and is present in the genomic sequence. cE86A is likely to represent an incompletely processed and truncated RNA based on the northern data, in which only one species of messenger RNA is detected and the observation that the sequence immediately 5' of the end of cE86A present in the genomic sequence is not capable of continuing the open reading frame, nor is there a consensus translation start or splice acceptor sequence in the vicinity.

To provide evidence of whether the 5' end of cE86C is at or near the transcription start site, a primer extension experiment was performed on embryonic mRNA. Using a 30-mer homologous to the opposite strand of sequences from 70 to 100 nucleotides from the 5' end of the cE86C (underlined in Fig. 5) we detected a single primer extension product of 119 nucleotides (Fig. 3B). If the 5' end of this extension product represents the legitimate transcription start site it would extend the transcript another 19 nucleotides 5' to the end of cE86C. Neither of the *bsh* cDNAs have 3' poly(A) tracts or polyadenylation signals. This signal presumably lies further 3' in the genomic DNA, accounting for the remaining difference between the combined size of the cDNAs and the size of the message predicted by northern blots.

The longest open reading frame (ORF) of cE86C is in frame with the homeobox codons. Starting from the first methionine codon (ATG; which is preceded by an in frame stop codon) to the first stop codon (TGA), the ORF spans 678 nucleotides and would encode a protein of 226 amino acids. Fig. 6A shows a schematic representation of the predicted protein. The homeodomain is in the carboxy-terminal half of the protein. Sequences outside of the homeodomain have no significant homology to known proteins, but contain a number of proline-rich stretches, a feature common to other transcription factors (Mitchell and Tjian, 1989).

A comparison of the *bsh* homeodomain with other published homeodomains reveals no strikingly close relatives in *Drosophila melanogaster* or in more divergent species. Fig. 6B shows a comparison of the *bsh* homeodomain to five of the most similar homeodomain sequences in *Drosophila*. *bsh* is most closely related to *Antennapedia*-like homeodomains, having the highest degree of similarity in the third helix region. The *Bar* class of homeodomains (Higashijima et al., 1992a) have the highest degree of sim-

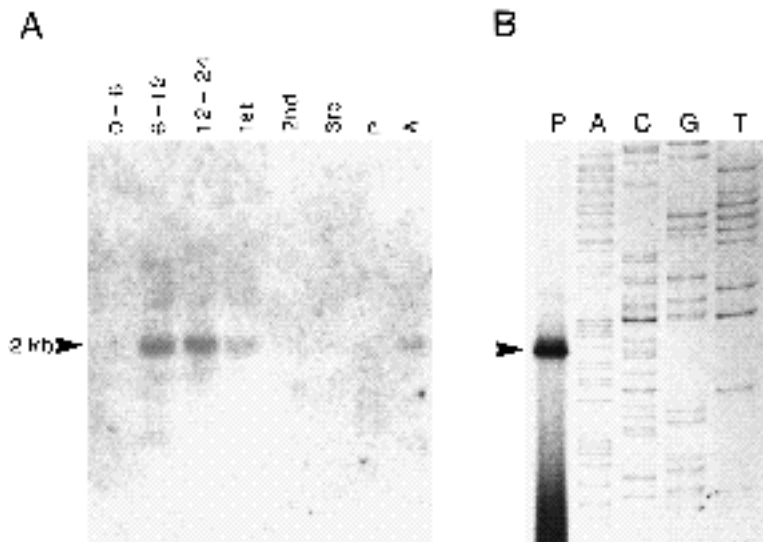

**Fig. 3.** Analysis of *bsh* transcripts. (A) Northern analysis of *bsh* mRNA expression throughout the *Drosophila* life cycle. Poly(A)<sup>+</sup> RNA from, 0- to 6-hour, 6- to 12-hour and 12- to 24-hour embryos, from first (1st), second (2nd) and third (3rd) instar larvae, from pupae (P) and from adults (A) was tested; 10  $\mu$ g of RNA was loaded in each lane. The position of the 2 kb *bsh* transcript is marked with an arrow. (B) Primer extension analysis. The autoradiogram shows the primer-dependent extension product (lane P) from a primer complementary to sequences 70-100 nucleotides from the 5' end of the *bsh* cDNA cE86C (underlined in Fig. 5), which has been hybridized to poly(A)<sup>+</sup> RNA from 12- to 24-hour embryos. Lanes A, C, G and T are dideoxy-chain termination sequencing tracks from a genomic subclone primed with the same primer, and therefore show sequences from the 5' region of the *bsh* transcription unit. The extension product (arrow) is 119 nucleotides in length and extends to a C residue which is depicted as +1 in Fig. 5.

ilarity to *bsh* (38 out of 60) but differ significantly by having an amino acid difference in the highly conserved third helix (Phe replaces Tyr).

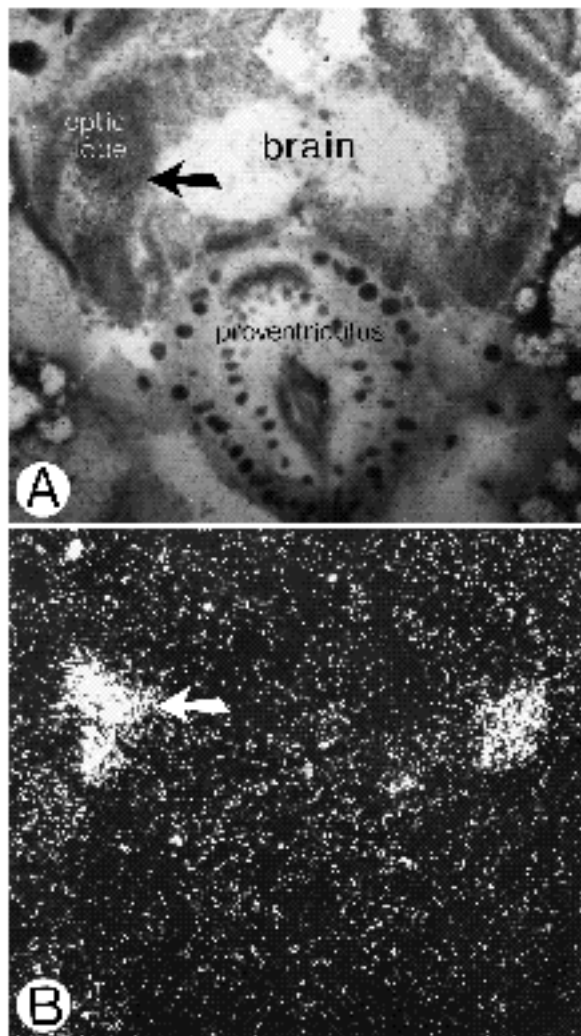

#### Localization of *bsh* protein during embryogenesis

To study the spatial expression of *bsh* in more detail we generated anti-*bsh* protein antibodies. Polyclonal rabbit antiserum was raised against a *bsh* fusion protein (see Materials and methods). This antiserum specifically recognizes *bsh* protein in embryos; animals in which the *bsh* gene is deleted (*Df(2L)OD16*, *Df(2L)TW65*, *Df(2L)pr65* homozygotes and trans-heterozygotes (see Fig. 2) fail to stain (data not shown).

Fig. 7 shows the immunostaining patterns of anti-*bsh* antiserum in wild-type embryos from about 7 hours to 15 hours of development (stages 11-16 of Campos-Ortega and Hartenstein, 1985). *bsh* staining is confined to the nuclei of cells. It first appears in four widely separated cells, two in each procephalic lobe just before the beginning of germ band retraction at around 7 hours of development (stage 11; Fig. 7A,B). These cells appear to be one or two cell layers beneath the epidermis. Judging by their position and size they are likely to be cells whose lineage is derived from the neurogenic ectoderm (Hartenstein and Campos-Ortega, 1984). At this time in development neuroblasts, glioblasts and the progenitors of other neuronal support cells are segregating from the epidermis of the procephalic neurogenic region; *bsh* expressing cells lie just below the neurogenic layer. In subsequent stages the number of *bsh* expressing cells increases in two bilateral clusters adjacent to the original two cells (Fig. 7C-F).

After germ band retraction, head movements reorganize the shape of the procephalic lobe (at the end of stage 13). The two halves of the procephalic lobe round up and rotate inwards to produce the two lobes of the brain (the supra-

**Fig. 4.** Expression of *bsh* transcripts in the optic lobes of the 3rd instar larva. Frozen sections of climbing 3rd instar OregonR flies were probed with <sup>35</sup>S-labeled antisense RNA transcribed from a 1.8 kb genomic fragment containing the *bsh* homeobox. (A) Bright-field and (B) dark-field photomicrographs of a horizontal medial section of a 3rd instar showing a section through the brain. *bsh* transcripts (arrows) are detected only in the developing optic lobes (anterior is up).

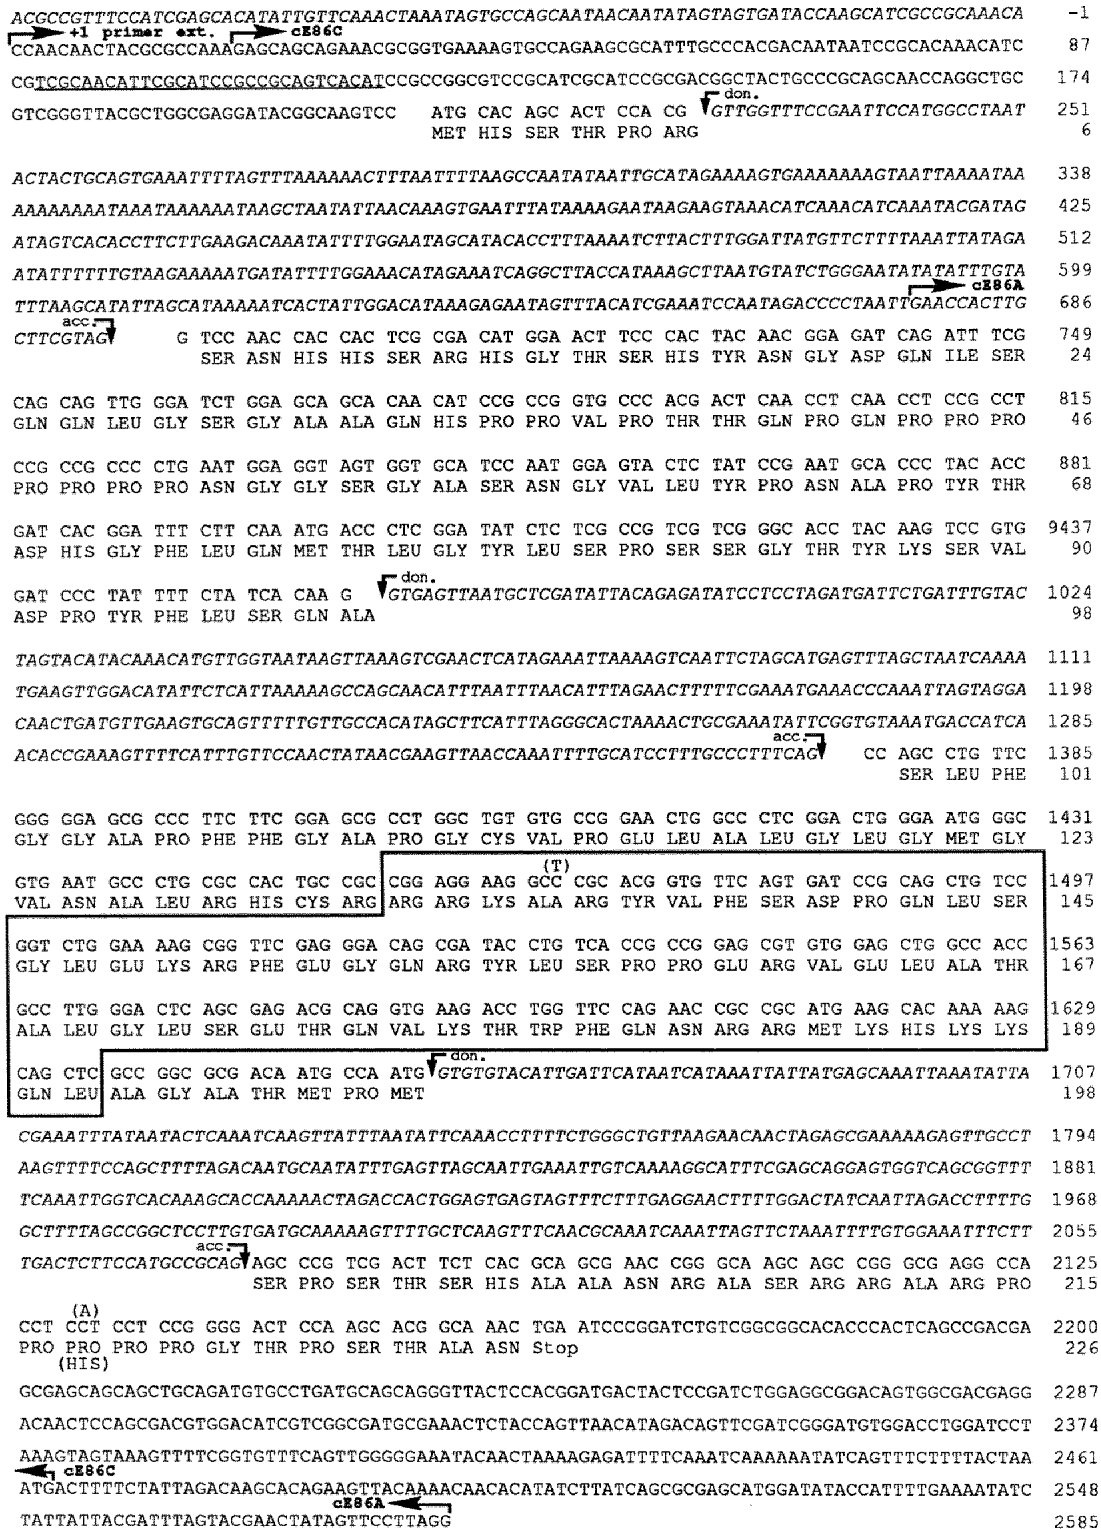

Fig. 5. Nucleotide and predicted amino acid sequence of the *bsh* gene. The entire sequence of the 2672 nucleotide genomic region encompassing the four *bsh* exons is shown. The introns and 5' non-transcribed sequences are depicted in italics. Donor (don.) and acceptor (acc.) splice sites are marked as determined by sequencing cDNAs and by conformation to consensus sequences (Mount, 1982). The homeodomain region is outlined. The start and end points of the two *bsh* cDNAs (cE86A and cE86C) are depicted with arrows. The predicted end point of the primer extension product is shown (+1 primer ext.) and the complementary sequence to the primer is underlined. Positions in which cE86C differs in sequence to both the genomic and cE86A sequences are shown in parentheses above the nucleotides; in one case the polymorphism causes a change in amino acid sequence (Pro to His at position 117). Genbank accession number is L06475.

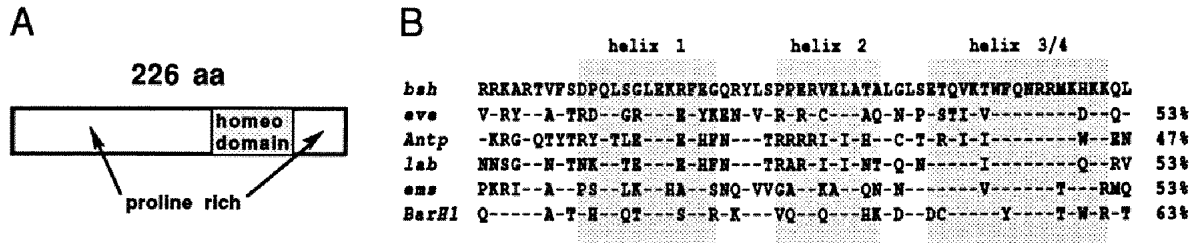

**Fig. 6.** *bsh* protein and homeodomain. (A) A schematic diagram of the predicted *bsh* protein. (B) Comparison of the *bsh* homeodomain sequence to sequences of related homeodomains. Only amino acids that differ from the *bsh* sequences are shown, and the percentage identity to *bsh* is listed at the end of each sequence. The positions of putative helix regions are shaded. References for sequences: *eve*, Macdonald et al. 1986, Frasch et al., 1987; *Antp*, McGinnis et al., 1984b, Scott and Weiner, 1984; *lab*, Mlodzik et al., 1988; *ems*, Dalton et al., 1989; and, *BarH1*, Higashijima et al., 1992a.

sophageal ganglia). The number of *bsh* expressing cells continues to increase during this period (Fig. 7G-I), and by the beginning of stage 15, the brain is almost completely formed and the *bsh* cells are arranged in their final pattern (Fig. 7J-L).

In stage 16 embryos (Fig. 7M-O) morphogenesis is essentially complete. Approximately 30 *bsh*-expressing cells can be counted in each brain hemisphere. These cells are clustered in four separate regions of the brain. The cells that were originally in the anteriormost cluster in stages 11-13 become situated in the dorsal brain (Fig. 7M,N) while the posterior-most cluster becomes situated in the ventrolateral posterior of the brain (Fig. 7M,O). A third small cluster of cells can be seen in the center of each brain hemisphere and a single *bsh* expressing cell can be found isolated at the ventral most portion of the brain (arrow in Fig. 7J,M).

We cannot say with certainty what range of cell types express *bsh* protein. Some of the cells expressing *bsh* protein also express the antigen for the monoclonal antibody mAb22C10 (Fujita et al., 1982; Zipursky et al., 1984) which stains a subset of neurons in the central nervous system. In addition, in serial plastic sections of anti-*bsh*-stained embryos we have observed processes leaving the cell bodies of a number of *bsh* expressing cells (data not shown). While it is likely that some of the *bsh* expressing cells are neurons, it cannot be ruled out that all are glia or other non-neuronal support cells whose numbers and types have not been well explored in the brain of the *Drosophila* embryo (see Jacobs et al., 1989).

### A *bsh*-expressing cell is closely associated with the terminus of Bolwig's nerve

In an attempt to understand more about the organization of *bsh*-expressing cells we performed double staining experiments on embryos with anti-*bsh* antiserum and a variety of neuronal markers. The neuron-specific mAb22C10 stains the cytoplasm of all neurons in the peripheral nervous system (PNS) as well as a small number in the central nervous system (CNS). Double staining with mAb22C10 and anti-*bsh* antibodies allows one to visualize the relationship of *bsh*-expressing cells with axons that innervate the brain from the PNS.

One of the most prominent PNS structures that innervate the brain is the nerve bundle of the larval photoreceptor

organs (Bolwig's organs). A pair of Bolwig's organs can be found in the cephalopharyngeal region of the embryo; bundles of 12 axons and surrounding glial elements leave each organ and make synaptic contacts with a subset of cells in the prospective optic lobes of each brain hemisphere (Steller et al., 1987). This axon bundle, known as Bolwig's nerve, appears to contact a *bsh*-expressing cell (Fig. 8). Fig. 8A shows a stage 16 embryo stained with *bsh* antiserum; a solitary *bsh* cell on the ventral most portion of the brain hemisphere lies near the anlagen of the optic lobes. When double stained with mAb22C10 and anti-*bsh* antiserum both Bolwig's nerve and *bsh*-expressing cells can be visualized (Fig. 8B,C). Bolwig's nerve traverses the ventral surface of the brain hemisphere and appears to terminate at the ventral *bsh*-expressing cell (Fig. 8C).

### Deletions of the *bsh* gene cause no obvious morphological defect

As described above, the *bsh* gene is deleted by a number of deficiencies that break in the 38A, chromosomal region (Fig. 2A). The small deficiency *Df(2L)OD16*, which deletes the large band at the beginning of 38A, is known to contain at least four previously isolated lethal complementation groups. Complementation analysis combined with the

**Fig. 7.** Expression of *bsh* protein during embryogenesis. *bsh* protein was detected by immunoperoxidase staining; the cephalic regions of stage 11 through stage 16 embryos are depicted, with anterior to the left. (A,B) Lateral and dorsal views, respectively, of a stage 11 embryo just before the beginning of germ band retraction. Note staining in two widely separated nuclei on both sides of the procephalic lobe. (C,D) Lateral and dorsal views of a stage 12 embryo during germ retraction. The number of *bsh* staining cells increases in two bilateral clusters. (E,F) Lateral and dorsal views of a stage 13 embryo, after germ band retraction is complete. (G,H,I) Lateral view and two dorsal views, of a stage 14 embryo during head involution. The two dorsal views are in different focal planes with H being more superficial than I. Notice that the two halves of the procephalic lobe begin to round up to form the two brain lobes. The number of *bsh* expressing cells continues to increase. (J,K,L) Lateral view and two dorsal views in different focal planes (K is more superficial than L) of a stage 15 embryo. The brain lobes are almost completely formed and *bsh* cells are in their final pattern. (M,N,O) Lateral view and two dorsal views (N is more superficial than O) of a stage 16 embryo. The arrow in J and M indicates a *bsh* expressing cell which contacts the Bolwig's nerve (see Fig. 8).



in situ hybridization data (described earlier) enabled us to order the position of these lethals with respect to deficiencies that break in *Df(2L)OD16* and the location of the *bsh* gene. Fig. 2B shows the results of the complementation analysis. The *bsh* gene maps to the region between the distal

breakpoints of *Df(2L)pr65* and *Df(2L)TW161*. This precludes the possibility that the previously isolated lethal mutations map in *bsh*. In further support of this conclusion, we have detected normal *bsh* protein expression in embryos of each one of these lethal lines.

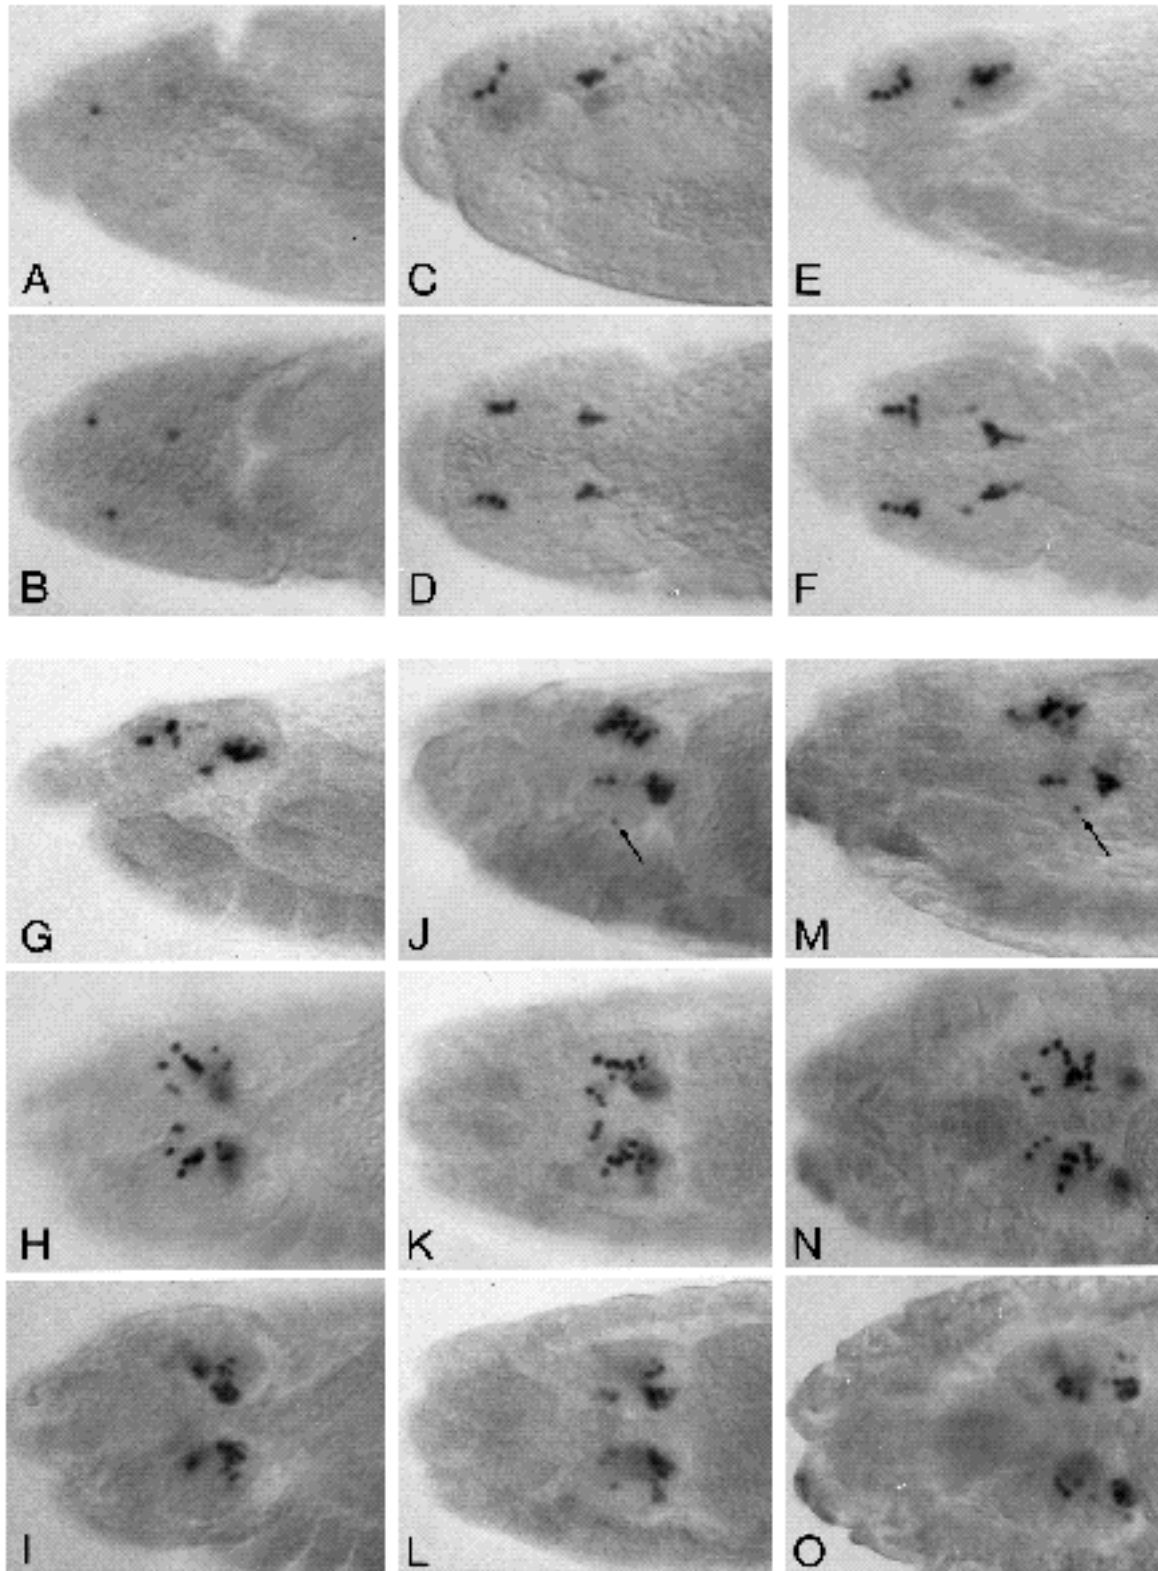

Fig. 7

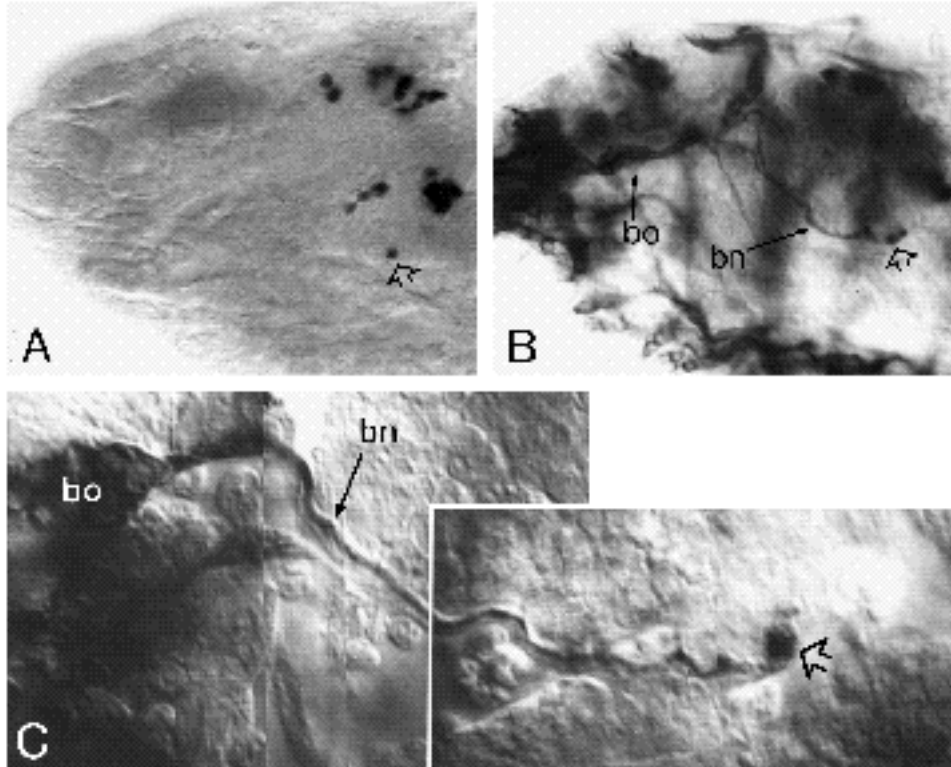

**Fig. 8.** A *bsh* expressing cell is closely associated with the terminus of Bolwig's nerve. (A) Lateral view of the cephalic region of a stage 16 embryo stained with anti-*bsh* antiserum. The open arrow points to a solitary *bsh*-expressing cell in the ventral-most region of the brain hemisphere. (B) Lateral view of a stage 16 embryo double-stained with anti-*bsh* antiserum and mAb22C10. mAb22C10 stains all peripheral neurons and a subset of central neurons; the larval photoreceptors or Bolwig's organ (bo) can be visualized. The axon bundle leaving Bolwig's organ called Bolwig's nerve (bn) can be seen traversing the ventral surface of the brain hemisphere and appears to terminate at the *bsh* expressing cell (open arrow). (C) A high

resolution composite image of an embryo similar to the one in B, taken with computer enhanced digital microscopy at higher magnification. Bolwig's nerve (bn) appears to contact the *bsh* expressing cell (open arrow). Anterior is to the left; dorsal is up.

Animals trans-heterozygous for *Df(2L)OD16* and *Df(2L)pr65* are deleted for a small interval that contains the *bsh* gene (see Fig. 2), and can be identified by their lack of staining with anti-*bsh* antiserum. These deletion mutants die soon after emerging as 1st instar larvae. Whether loss of *bsh* function contributes to the lethal phenotype is as yet unknown, as other genes besides *bsh* may be eliminated in the transheterozygotes.

We have used a variety of nervous system markers to determine if the structure of the brain is grossly altered in embryos carrying deletions of *bsh*. *Df(2L)OD16/Df(2L)pr65* trans-heterozygotes (hereafter called '*bsh*-interval deletion embryos') were double stained with antibodies that visualize many aspects of the brain (see Materials and methods for probes used) and anti-*bsh* antiserum which allowed us to identify embryos lacking *bsh* protein. We also performed serial plastic sections through the brains of both wild type and *bsh*-interval deletion embryos. In *bsh*-interval deletion embryos the overall structure of the brain appears to be normal at this crude level of analysis; stage 16 embryos have no obvious alterations in the size and morphology of the brain hemispheres, and the size and shapes of the commissures also appear normal.

On a superficial level it appears that *bsh* is not required for the proper pathfinding of Bolwig's nerve. Under the light microscope Bolwig's nerve appears normal in *bsh*-interval deletion embryos. As shown by Steller et al. (1987) Bolwig's nerve sends out axons to the developing ventral brain at stage 12, which is prior to the appearance of *bsh* expression in the same region. In light of these observa-

tions we wondered if innervation of Bolwig's nerve is required for the activation of *bsh* expression in the ventral brain. To test this hypothesis we looked at *bsh* protein expression in *glass*<sup>2</sup> mutants in which the development of Bolwig's organ does not occur (Moses et al., 1989). In *glass*<sup>2</sup> mutants, despite the absence of Bolwig's nerve, *bsh* expression is normal. Thus contact from Bolwig's nerve is not required for the activation of *bsh* protein expression in the ventral cell that is associated with the terminus of the photoreceptor nerve.

#### Transient ectopic expression of *bsh* protein has no detectable phenotype

To assess the phenotypic consequences of transient ectopic *bsh* expression throughout the nervous system we constructed transgenic fly lines which carry a *bsh* cDNA (cE86C) fused to the *hsp70* promoter (Fig. 9). Six independent lines were generated from a single original insertion, in which abundant levels of *bsh* protein can be detected throughout the embryo after a one hour heat shock (Fig. 9B). A number of different heat shock regimes were applied to *hsp70-bsh* embryos, including multiple 1 hour heat shocks during the period of nervous system development. Embryos that are treated with multiple heat shocks are for the most part viable and produce healthy adults, showing no significant difference in viability when compared to a control strain (the parental strain *Df(1)w, yw<sup>67c23(2)</sup>*) treated with the same regime. Embryos that have been treated with up to three 1 hour heat shocks and stained after 15 hours of development (when the nervous system is almost fully

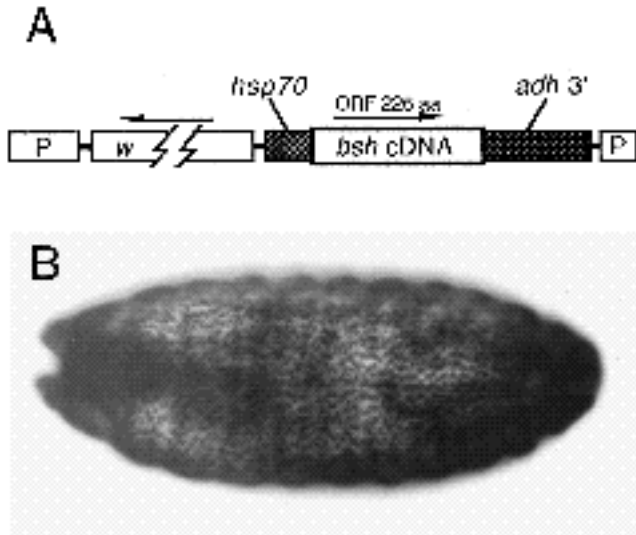

**Fig. 9.** Ectopic expression of *bsh* protein from an *hsp70-bsh* fusion gene. (A) Diagram of the *hsp70-bsh* fusion gene P element construct used to make *hsp70-bsh* lines. The *bsh* cDNA cE86C is fused to heat inducible *hsp70* promoter sequences and 3 untranslated sequences of the *Adh* gene containing polyadenylation signals. P denotes the P element terminal sequences and *w*, the *white* gene used to select for transformants; these sequences are derived from the CaSpeR vector (Pirrotta et al., 1988). (B) A ventral view of an *hsp70-bsh* embryo stained with anti-*bsh* antiserum shortly after a 1 hour heat shock. Note abundant levels of *bsh* protein detected throughout the embryo.

formed) show normal staining patterns of anti-*bsh* antiserum and the neural markers mAb22C10, mAbBP102, and anti-HRP (see Materials and methods). 1 hour heat shocks repeated at 12 hour intervals to *hsp70-bsh* animals during larval and pupal development results in viable adults which appear healthy and are capable of flight. However, they have not been rigorously tested for other behavioral abnormalities. While we have not yet detected any phenotypes produced by ectopic expression of *bsh* protein in *hsp70-bsh* lines, it should be pointed out that we have no evidence that a functional *bsh* protein is produced by our construct.

## DISCUSSION

In this paper we have presented a molecular analysis of a new *Drosophila* homeobox gene, determined its pattern of expression in the embryo, and initiated a genetic analysis of its function. This homeobox gene, called *bsh*, is the first described to be expressed exclusively in the embryonic brain (the supraesophageal ganglion). *bsh* protein is found in a very restricted pattern, expressed in approximately 30 cells in each brain hemisphere. This expression pattern suggests that *bsh* may play a highly specialized role in the differentiation and function of neural cell types in this complex part of the nervous system.

The *bsh* homeobox was isolated by low stringency hybridization to the *eve* homeobox (Dalton et al., 1989) despite the fact that the genes share only 53% amino-acid identity over the homeodomain region. The ability to pick

up *bsh* using the *eve* probe may be due to the highly conserved third helix codons which results in a 24 nucleotide stretch of perfect sequence identity (Macdonald et al., 1986; Frasch et al., 1987). While no highly conserved relatives have yet been discovered in *Drosophila* or other organisms, *bsh* shares the most similarity to Antennapedia-class homeodomains in the third helix region, the so called 'recognition helix' where the protein interacts with the major groove of DNA (Treisman et al., 1989; Kissinger et al., 1990). The Bar class of homeodomains (Higashijima et al., 1992a) are most similar to *bsh*, sharing 63% amino-acid identity, although they differ in the most highly conserved part of the third helix by a single amino acid substitution. With a predicted size of 226 amino-acids, *bsh* is a small protein in comparison to other *Drosophila* homeoproteins (Tomlinson et al., 1988).

It is at present difficult to propose a model for the regulatory mechanisms that would activate *bsh* in such a discrete set of cells in the brain. Little is known about the genetic mechanisms that control the development of the procephalic region. One attractive hypothesis that we explored was that *bsh* might be activated in discrete cells by inductive events caused by the innervation of the brain from the peripheral nervous system. This model has been suggested to function in the development of the optic ganglia in the imaginal visual system in which photoreceptor cell innervation into the optic lobes has been proposed to induce the differentiation of ganglion mother cells into neurons (Meinhertzhagen, 1975; Meyerowitz and Kankel, 1978; Kankel et al., 1980; Fishbach and Technau, 1984; Selleck and Steller, 1991). The observation that a *bsh* expressing cell is closely associated with the terminus of the larval photoreceptor nerve (Bolwig's nerve) led us to test whether the activation of *bsh* in that cell represented an analogous, or indeed homologous, innervation-induced differentiation event in the embryonic brain. We have found that *bsh* activation is normal in the absence of innervation from Bolwig's nerve, showing that *bsh* expression is not under the control of photoreceptor axon induced activation.

In order to gain some insight into the function of the *bsh* protein in the brain, we have examined the brains of embryos in which the *bsh* gene is genetically deleted, and in which *bsh* has been transiently ectopically activated. The possibility that *bsh* expression may be required for the proper targeting of the axons of the Bolwig's nerve was explored. In *bsh*-interval deletion embryos, Bolwig's nerve appears normal and thus at the gross level does not seem to require *bsh* expression. We have so far detected no morphological defects associated with the deletion of the *bsh* gene. Nor does the transient ectopic expression of the *bsh* protein throughout the embryo have an obvious morphological effect.

Given what we know about the function of other homeobox genes in the nervous system, it is plausible that *bsh*-interval deletion embryos have defects too subtle to detect without appropriate markers. In *Drosophila* the function of homeobox genes in the CNS has been best explored in the cases of *ftz* and *eve* (Doe et al., 1988a,b). In embryos mutant for *ftz* nervous system expression, for seven different neuronal types examined that normally express *ftz*, only one type of neuron had altered neuronal morphology. The altered

RP2 neurons changed their axonal pathways as if they had assumed the identity of sibling RP1 neurons. In the absence of *eve* function in the CNS similar transformations were observed, resulting in aberrant axonal morphologies in the aCC neurons and the RP2 neurons. Both the *cut* and the *Bar* genes in *Drosophila* and the *mec-3* and *unc-86* genes in *C. elegans* have been shown to be involved in similar differentiation decisions in which one neural cell type is changed into another (Bodmer et al., 1987; Blochlinger et al., 1991; Higashijima et al., 1992a,b; Way and Chalfie, 1988; Finney et al., 1988). If *bsh* functions in a similar way, the transformation of some *bsh* cells into other cell types in *bsh* mutants may have little effect on the overall morphology and structure of the brain that would allow us to detect such change without appropriate markers.

Another possibility is that *bsh* is not required for the actual morphology of brain cells, the axonal pathways, etc., but instead regulates expression of neurotransmitters, receptors, channels, synaptic specializations, or other effector molecules that are critical to the physiologic function of particular neural cells. Such functions would be missed in our analysis. Finally, it is possible that *bsh* represents a redundant or an obsolete gene. The continuing searches for enhancer trap lines, mAbs and other probes with specific patterns of expression in the nervous system, and the identification of neural effector genes whose patterns overlap *bsh* expression, will generate the markers enabling the elucidation of *bsh* genetic functions.

We thank Haig Keshishian for producing the computer enhanced digital images, Mike Kuziora for donating the Northern blot and staged RNAs, Seymour Benzer and Corey Goodman for providing monoclonal antibodies, Anette Preiss and John Tamkun for genomic libraries and Larry Kauvar for cDNA libraries. We are grateful to those who contributed fly strains, especially Ted Wright, Barry Ganetzky, Doug Kankel and the Mid-America *Drosophila* Stock Center at Bowling Green. We also thank David Wassarman for help with the initial characterization of *bsh* transcript distribution. This work was supported by a grant from the American Cancer Society and by a National Institutes of Health training grant (T32GM07223).

## REFERENCES

- Affolter, M., Percival-Smith, A., Müller, M., Leupin, W. and Gehring, W. J. (1990). DNA binding properties of the purified antennapedia homeodomain. *Proc. Natl. Acad. Sci. USA* **87**, 4093-4097.
- Akam, M. E. (1987). The molecular basis for metameric pattern in the *Drosophila* embryo. *Development* **101**, 1-22.
- Ausubel, F. M., Brent, R., Kingston, R. E., Moore, D. D., Smith, J. A., Seidman, J. G. and Struhl, K. (1987). *Current Protocols in Molecular Biology*. New York: John Wiley and Sons.
- Barad, M., Jack, T., Chadwick, R. and McGinnis, W. (1988). A novel, tissue-specific, *Drosophila* homeobox gene. *EMBO J.* **7**, 2151-2161.
- Beachy, P. A., Krasnow, M. A., Gavis, E. R. and Hogness, D.S. (1988). An *Ultrathorax* protein binds sequences near its own and the *Antennapedia* P1 promoters. *Cell* **55**, 1069-1081.
- Billin, A. N., Cockerill, K. A. and Poole, S. J. (1991). Isolation of a family of *Drosophila* POU domain genes expressed in early development. *Mech. Dev.* **34**, 75-84.
- Blochlinger, K., Jan, L. Y. and Jan Y. N. (1991). Transformation of sensory organ identity by ectopic expression of *cut* in *Drosophila*. *Genes Dev.* **5**, 1124-1135.
- Bodmer, R., Barbel, S., Sheperd, S., Jack, J., Jan, L. Y. and Jan, Y. N. (1987). Transformation of sensory organs by mutations of the cut locus of *D. melanogaster*. *Cell* **51**, 293-307.
- Bodmer R., Jan, L. Y. and Jan Y. N. (1990). A new homeobox-containing gene, *msh-2*, is transiently expressed early during mesoderm formation of *Drosophila*. *Development* **110**, 661-669.
- Brittacher, J. G. and Ganetzky, B. (1983). On the components of segregation distortion in *Drosophilamelanogaster*. II. Deletion mapping and dosage analysis of the *SD* locus. *Genetics* **103**, 659-673.
- Campos-Ortega, J. A. and Hartenstein, V. (1985). *The Embryonic Development of Drosophila melanogaster*. Berlin: Springer-Verlag.
- Chadwick, R. and McGinnis, W. (1987). Temporal and spatial distribution of transcripts from the *Deformed* gene of *Drosophila*. *EMBO J.* **6**, 779-789.
- Dalton, D., Chadwick, R. and McGinnis, W. (1989). Expression and embryonic function of *empty spiracles*: a *Drosophila* homeobox gene with two patterning functions on the anterior-posterior axis of the embryo. *Genes Dev.* **3**, 1940-1956.
- Desplan, C., Theis, J. and O'Farrell, P. H. (1988). The sequence specificity of homeodomain-DNA interaction. *Cell* **54**, 1081-1090.
- Dessain, S. and McGinnis, W. (1993). *Drosophila* homeobox genes. In *Advances in Developmental Biochemistry*, vol. 2 (ed. P.M. Wassarman) Greenwich, CT: JAI press Inc. (in press).
- Dessain, S., Gross, C. T., Kuziora, M. and McGinnis, W. (1992). Antp-type homeodomains have distinct DNA binding specificities that correlate with their target specificities in the embryo. *EMBO J.* **11**, 991-1002.
- Doe, C. Q. and Scott, M. P. (1988). Segmentation and homeotic gene function in the developing nervous system of *Drosophila*. *Trends Neurosci.* **11**, 101-106.
- Doe, C. Q., Hiromi, Y., Gehring, W.J. and Goodman, C. S. (1988a). Expression and function of the segmentation gene *fushi tarazu* during *Drosophila* neurogenesis. *Science* **239**, 170-175.
- Doe, C. Q., Smouse, D. and Goodman, C. S. (1988b). Control of neuronal fate by the *Drosophila* segmentation gene *even-skipped*. *Nature* **333**, 376-378.
- Doe, C. Q., Chu-LaGriff, Q., Wright, D. M. and Scott, M. P. (1991). The *prospero* gene specifies cell fates in the *Drosophila* central nervous system. *Cell* **65**, 451-464.
- Dohrmann, C., Azpiazu, N. and Frasch, M. (1990). A new *Drosophila* homeobox gene is expressed in mesodermal precursor cells of distinct muscles during embryogenesis. *Genes Dev.* **4**, 2098-2111.
- Ekker, S. C., Young, K. E., von Kessler, D. P. and Beachy, P. A. (1991). Optimal DNA sequence recognition by the Ultrathorax homeodomain of *Drosophila*. *EMBO J.* **10**, 1179-1186.
- Elkins T., Zinn, K., McAllister, L. Hoffman, F.M. and Goodman, C. S. (1990). Genetic analysis of a *Drosophila* neural cell adhesion molecule: interaction of fasciclin I and Abelson tyrosine kinase mutations. *Cell* **60**, 565-575.
- Feinberg, A. P. and Vogelstein, B. (1983). A technique for radiolabeling DNA restriction endonuclease fragments to high specific activity. *Anal. Biochem.* **132**, 6-13.
- Finkelstein, R. Smouse, D., Capaci, T., Spradling, A. C. and Perrimon, N. (1990). The *orthodenticle* gene encodes a novel homeodomain protein involved in the development of the *Drosophila* nervous system and ocellar visual structures. *Genes Dev.* **4**, 1516-1527.
- Finney, M., Ruvkun, G. and Horvitz, H. R. (1988). The *C. elegans* cell lineage and differentiation gene *unc-86* encodes a protein with a homeodomain and extended similarity to transcription factors. *Cell* **55**, 757-769.
- Fishbach, K. F. and Technau, G. (1984). Cell degeneration in the developing optic lobes of the sine oculis and small-optic-lobes mutants of *Drosophilamelanogaster*. *Dev. Biol.* **104**, 219-239.
- Fortini, M. E., Lai, Z. and Rubin, G. M. (1991). The *Drosophilazhf-1* and *zhf-2* genes encode novel proteins containing both zinc-finger and homeodomain motifs. *Mech. Dev.* **34**, 113-122.
- Frasch, M., Hoey, T., Rushlow, C., Doyle, H. and Levine, M. (1987). Characterization and localization of the *even-skipped* protein of *Drosophila*. *EMBO J.* **6**, 749-759.
- Fujita, S. C., Zipursky, S. L., Benzer, S., Ferrus, A. and Shotwell, S. L. (1982). Monoclonal antibodies against the *Drosophila* nervous system. *Proc. Natn. Acad. Sci. USA* **79**, 7929-7933.
- Gehring, W. J. (1987). The homeobox: structural and evolutionary aspects. In: *Molecular Approaches to Developmental Biology* (eds R. Firtel and E. Davidson), pp. 115-129. New York: Alan R. Liss, Inc.

- Gibson, G., Schier, A., LeMotte, P. and Gehring, W. J. (1990). The specificities of *Sex combs reduced* and *Antennapedia* are defined by a distinct portion of each protein that includes the homeodomain. *Cell* **62**, 1087-1103.
- Hartenstein, V. and Campos-Ortega, J. A. (1984). Early neurogenesis in wild-type *Drosophila melanogaster*. *Roux's Arch. Dev. Biol.* **193**, 308-325.
- Heuer, J. G. and Kaufman, T. C. (1992). Homeotic genes have specific functional roles in the development of the *Drosophila* embryonic peripheral nervous system. *Development* **115**, 35-47.
- Higashijima, S., Kojima, T., Michiue, T., Ishimaru, S., Emori, Y. and Saigo, K. (1992a). Dual *Bar* homeobox genes of *Drosophila* required in two photoreceptor cells, R1 and R6 and primary pigment cells for normal eye development. *Genes Dev.* **6**, 50-60.
- Higashijima, S., Michiue, T., Emori, Y. and Saigo, K. (1992b). Subtype determination of *Drosophila* embryonic external sensory organs by redundant homeobox genes *BarH1* and *BarH2*. *Genes Dev.* **6**, 1005-1018.
- Hoey, T. and Levine, M. (1988). Divergent homeobox proteins recognize similar DNA sequences in *Drosophila*. *Nature* **332**, 858-861.
- Hooper, J. E. (1986). Homeotic gene function in the muscles of *Drosophila* larvae. *EMBO J.* **5**, 2321-2329.
- Hortsch, M., Bieber, A. J., Patel, N. H. and Goodman, C. S. (1990). Differential splicing generates a nervous system-specific form of *Drosophila* neuroglian. *Neuron* **4**, 697-709.
- Immerglück, K., Lawrence, P. A. and Bienz, M. (1990). Induction across germ layers in *Drosophila* mediated by a genetic cascade. *Cell* **62**, 261-268.
- Ingham, P. W. and Martinez Arias, A. (1992). Boundaries and fields in early embryos. *Cell* **68**, 221-235.
- Jack, T., Regulski, M. and McGinnis, W. (1988). Pair-rule segmentation genes regulate the expression of the homeotic selector gene, *Deformed*. *Genes Dev.* **2**, 635-651.
- Jacobs, J. R., Hiromi, Y., Patel, N. H. and Goodman, C. S. (1989). Lineage, migration and morphogenesis of longitudinal glia in the *Drosophila* CNS as revealed by a molecular lineage marker. *Neuron* **2**, 1625-1631.
- Jan, L. Y. and Jan, Y. N. (1982). Antibodies to horseradish peroxidase as specific neuronal markers in *Drosophila* and in grasshopper embryos. *Proc. Natl. Acad. Sci. USA* **79**, 2700-2704.
- Johansen, J., Halpern, M. E., Johansen, K. M. and Keshishian, H. (1989). Stereotypic morphology of glutamatergic synapses on identified muscle cells of *Drosophila* larvae. *J. Neurosci.* **9**, 710-725.
- Johnson, W. A. and Hirsh, J. (1990). Binding of a *Drosophila* POU-domain protein to a sequence element regulating gene expression in specific dopaminergic neurons. *Nature* **343**, 467-470.
- Jones, B. and McGinnis, W. (1993) *empty spiracles* is a homeotic downstream gene that mediates a segmental identity function of *Abdominal-B* during *Drosophila* embryogenesis. *Genes Dev.* (in press).
- Jürgens, G., Wieschaus, E., Nüsslein-Volhard, C., Kluding, H. (1984). Mutations affecting the pattern of the larval cuticle in *Drosophila melanogaster*. II. Zygotic loci on the third chromosome. *Roux's Arch. Dev. Biol.* **193**, 283-295.
- Kankel, D. R., Ferrús, A., Garen, S. H., Harte, P. J. and Lewis, P. E. (1980). The structure and development of the nervous system. In *The Genetics and Biology of Drosophila melanogaster*, vol. 2d (eds Ashburner, M. and Wright, T. R. F.), pp. 295-368. New York: Academic Press.
- Karess, R. E. and Rubin, G. M. (1984). Analysis of P-transposable element functions in *Drosophila*. *Cell* **38**, 135-146.
- Kaufman, T. C., Lewis, R. and Wakimoto, B. (1980). Cytogenetic analysis of chromosome 3 in *Drosophila melanogaster*: The homeotic gene complex in polytene chromosome interval 84A-B. *Genetics* **94**, 115-133.
- Kim, Y. and Nirenberg, M. (1989). *Drosophila* NK-homeobox genes. *Proc. Natl. Acad. Sci. USA* **86**, 7716-7720.
- Kissinger, C. R., Liu, B., Martin-Blanco, E., Kornberg, T. B. and Pabo, C. O. (1990). Crystal structure of an engrailed homeodomain-DNA complex at 2.8 Å resolution: a framework for understanding homeodomain-DNA interactions. *Cell* **63**, 579-590.
- Kuziora, M.A. and McGinnis, W. (1988). Autoregulation of a *Drosophila* homeotic selector gene. *Cell* **55**, 477-485.
- Kuziora, M.A. and McGinnis, W. (1989). A homeodomain substitution changes the regulatory specificity of the *Deformed* protein in *Drosophila* embryos. *Cell* **59**, 563-571.
- Kuziora, M.A. and McGinnis, W. (1991). Altering the target specificity of the *Deformed* protein in *Drosophila* embryos by substituting the Abdominal-B homeodomain. *Mech. Dev.* **33**, 83-94.
- Lai, Z., Fortini, M. and Rubin, G. M. (1991). The embryonic expression patterns of *zfh-1* and *zfh-2*, two *Drosophila* genes encoding novel zinc-finger homeodomain proteins. *Mech. Dev.* **34**, 123-134.
- Langer-Safer, P. R., Levine, M. and Ward, D. C. (1982). Immunological method for mapping genes on *Drosophila* polytene chromosomes. *Proc. Natl. Acad. Sci. USA* **79**, 4381-4385.
- Laughon, A. and Scott, M. P. (1984). Sequence of a *Drosophila* segmentation gene: protein structure homology with DNA-binding proteins. *Nature* **310**, 25-31.
- Levine, M., Harding, K., Wedeen, C., Doyle, H., Hoey, T. and Radomska, H. (1985). Expression of the homeobox gene family in *Drosophila*. *Cold Spring Harbor quant. Symp. Biol.* **50**, 209-222.
- Lewis, E. B. (1978). A gene complex controlling segmentation in *Drosophila*. *Nature* **276**, 565-570.
- Lindsley, E. L. and Zimm, G. M. (1992). *The Genome of Drosophila melanogaster*. San Diego: Academic Press.
- Malicki, J., Schughart, K. and McGinnis, W. (1990). Mouse Hox 2.2 specifies thoracic segmental identity in *Drosophila* embryos and larvae. *Cell* **63**, 961-967.
- Macdonald, P. M., Ingham, P. and Struhl, G. (1986). Isolation, structure, and expression of *even-skipped*: a second pair-rule gene of *Drosophila* containing a homeobox. *Cell* **47**, 721-734.
- Macdonald, P. M. and Struhl, G. (1986). Molecular gradient in early *Drosophila* embryogenesis and its role in specifying body pattern. *Nature* **324**, 537-545.
- Maniatis, T., Fritsch, E. F. and Sambrook, J. (1982). *Molecular Cloning. A Laboratory Manual*. New York: Cold Spring Harbor Laboratory.
- Mann, R. S. and Hogness, D. S. (1990). Functional dissection of Ultrabithorax proteins in *D. melanogaster*. *Cell* **60**, 597-610.
- McGinnis, W., Levine, M., Hafen, E., Kuroiwa, A. and Gehring, W. J. (1984a). A conserved DNA sequence found in homeotic genes of the *Drosophila* Antennapedia and Bithorax complexes. *Nature* **308**, 428-433.
- McGinnis, W., Garber, R. L., Wirz, J., Kuroiwa, A. and Gehring, W. J. (1984b). A homologous protein-coding sequence in *Drosophila* homeotic genes and its conservation in other metazoans. *Cell* **37**, 403-408.
- McGinnis, W. and Krumlauf, R. (1992). Homeobox genes and axial patterning. *Cell* **68**, 283-302.
- Meinhertzhagen, I. A. (1975). The development of neuronal connection patterns in the visual system of insects. In *Cell Patterning, Ciba Foundation Symposium*, vol. 29, pp. 265-282. New York: Elsevier.
- Messing, J. (1983). New M13 vectors for cloning. *Meth. in Enzym.* **101**, 20-77.
- Meyerowitz, E.M. and Kankel, D.R. (1978). A genetic analysis of visual system development in *Drosophila melanogaster*. *Dev. Biol.* **62**, 112-142.
- Miller, D. M., Shen, M. M., Shamu, C. E., Bürglin, T. R., Ruvkun, G., Dubois, M. L., Ghee, M. and Wilson, L. (1992). *C. elegans unc-4* gene encodes a homeodomain protein that determines the pattern of synaptic input to specific motor neurons. *Nature* **355**, 841-845.
- Mitchell, P. J. and Tjian, R. (1989). Transcriptional regulation in mammalian cells by sequence-specific DNA binding proteins. *Science* **245**, 371-378.
- Mlodzik, M., Fjose, A. and Gehring, W. J. (1988). Molecular structure and spatial expression of a homeobox gene from the *labial* region of the *Antennapedia*-complex. *EMBO J.* **7**, 2569-2578.
- Moses, K., Ellis, M. C. and Rubin, G. M. (1989). The *glass* gene encodes a zinc-finger protein required by *Drosophila* photoreceptor cells. *Nature* **340**, 531-536.
- Mount, S. (1982). A catalogue of splice junction sequences. *Nucl. Acids Res.* **10**, 459-471.
- Nüsslein-Volhard, C. and Wieschaus, E. (1980) Mutations affecting segment number and polarity in *Drosophila*. *Nature* **287**, 795-801.
- Nüsslein-Volhard, C., Wieschaus, E. and Kluding, H. (1984). Mutations affecting the pattern of the larval cuticle in *Drosophilamelanogaster*. I. Zygotic loci on the second chromosome. *Roux's Arch. Dev. Biol.* **193**, 267-282.
- O'Kane and Gehring, W. (1987). Detection in situ of genomic regulatory elements of *Drosophila*. *Proc. Natl. Acad. Sci. USA* **84**, 9123-9127.
- Otting, G., Qian, Y. Q., Billeter, M., Muller, M., Affolter, M., Gehring, W. J. and Wüthrich, K. (1990). Protein-DNA contacts in the structure of

- a homeodomain-DNA complex determined by nuclear magnetic resonance spectroscopy in solution. *EMBO J.* **9**, 3085-3092.
- Patel, N. H., Snow, P. M. and Goodman, C. S.** (1987). Characterization and cloning of fasciclin III: A glycoprotein expressed on a subset of neurons and axon pathways in *Drosophila*. *Cell* **48**, 975-988.
- Patel, N. H., Schafer, B., Goodman, C. S. and Holmgren, R.** (1989). The role of segment polarity genes during *Drosophila* neurogenesis. *Genes Dev.* **3**, 890-904.
- Pirotta, V.** (1988). Vectors for P-mediated transformations in *Drosophila*. In *Vectors: A Survey of Molecular Cloning Vectors and Their Uses* (eds R.L. Rodriguez and D.T. Reinhardt), pp. 437-456. Boston: Butterworths.
- Poole, S. J., Kauvar, L. M., Drees, B. and Kornberg, T.** (1985). The *engrailed* locus of *Drosophila*: Structural analysis of an embryonic transcript. *Cell* **40**, 37-43.
- Preiss, A., Rosenberg, U. B., Kienlin, A., Seifert, E. and Jäckle, H.** (1985). Molecular genetics of *Kruppel*, a gene required for segmentation of the *Drosophila* embryo. *Nature* **313**, 27-32.
- Reuter, R. and Scott, M. P.** (1990). Expression and function of the homeotic genes *Antennapedia* and *Sex combs reduced* in the embryonic midgut of *Drosophila*. *Development* **109**, 289-303.
- Robertson, H. M., Preston, C.R., Phillis, R. W., Johnson-Schlitz, D. M., Benz, W. K. and Engels, W. R.** (1988). A stable genomic source of P-element transposase in *Drosophila melanogaster*. *Genetics* **118**, 461-470.
- Rubin, G. M. and Spradling, A. C.** (1982). Genetic transformation of *Drosophila* with transposable element vectors. *Science* **218**, 348-353.
- Sanger, F., Nicklen, S. and Coulson, A. R.** (1977). DNA sequencing with chain terminating inhibitors. *Proc. Natl. Acad. Sci.* **74**, 5463-5467.
- Scott, M. P., Tamkun, J. W. and Hartzell, III, G. W.** (1989). The structure and function of the homeodomain. *Biochim. Biophys. Acta.* **989**, 25-48.
- Scott, M. P. and Weiner, A.** (1984). Structural relationships among genes that control development: Sequence homology between the *Antennapedia*, *Ultrabithorax*, and *fushi tarazu* loci of *Drosophila*. *Proc. Natl. Acad. Sci.* **81**, 4115-4119.
- Selleck, S. B. and Steller, H.** (1991). The influence of retinal innervation on neurogenesis in the first optic ganglion of *Drosophila*. *Neuron* **6**, 83-99.
- Small, S. and Levine, M.** (1991). The initiation of pair-rule stripes in the *Drosophila* blastoderm. *Curr. Opin. Gen. Dev.* **1**, 255-260.
- Snow, P. M., Patel, N. H., Harrelson, A. L. and Goodman, C. S.** (1987). Neural-specific carbohydrate moiety shared by many surface glycoproteins in *Drosophila* and grasshopper embryos. *J. Neurosci.* **7**, 4137-4144.
- St. Johnston, D. and Nüsslein-Volhard, C.** (1992). The origin of pattern and polarity in the *Drosophila* embryo. *Cell* **68**, 201-219.
- Steller, H., Fischbach, K. F. and Rubin, G. R.** (1987). *disconnected*: a locus required for neuronal pathway formation in the visual system of *Drosophila*. *Cell* **50**, 1139-1153.
- Studier, F. W. and Moffatt, B. A.** (1986). Use of bacteriophage T7 RNA polymerase to direct selective high-level expression of cloned genes. *J. Mol. Biol.* **189**, 113-130.
- Tomlinson, A., Kimmel, B., E. and Rubin, G. M.** (1988). *rough*, a *Drosophila* homeobox gene required in photoreceptors R2 and R5 for inductive interactions in the developing eye. *Cell* **55**, 771-784.
- Treacy, M. N., He, X. and Rosenfeld, M. G.** (1991). I-POU: a POU-domain protein that inhibits neuron-specific gene activation. *Nature* **350**, 577-584.
- Treisman, J., Gönczy, Vashishtha, M., Harris, E. and Desplain C.** (1989). A single amino acid can determine the DNA binding specificity of homeodomain proteins. *Cell* **59**, 553-562.
- Vaessin, H., Grell, E., Wolff, E., Bier, E., Jan, L. Y. and Jan, Y. N.** (1991). *prospero* is expressed in neuronal precursors and encodes a nuclear protein that is involved in the control of axonal outgrowth in *Drosophila*. *Cell* **67**, 941-953/.
- Way, J.C. and Chalfie, M.** (1988). *mec-3*, a homeobox-containing gene that specifies differentiation of the touch receptor neurons in *C.elegans*. *Cell* **54**, 5-16.
- Wieschaus, E., Nusslein-Volhard, C. and Kluding, H.** (1984). Mutations affecting the pattern of the larval cuticle of *Drosophila melanogaster*. III. Zygotic loci on the X chromosome and fourth chromosome. *Roux's Arch. Dev. Biol.* **193**, 296-307.
- Wright, T. R. F., Hodgetts, R. B. and Sherald, A. F.** (1976a). The genetics of dopa decarboxylase in *Drosophila melanogaster*. I. Isolation and characterization of deficiencies that delete the dopa-decarboxylase-dosage-sensitive region and the -methyl-dopa-byersensitive locus. *Genetics* **84**, 267-285.
- Wright, T. R. F., Bewley, G. C. and Sherald, A. F.** (1976b). The genetics of dopa decarboxylase in *Drosophila melanogaster*. I. Isolation and characterization of dopa-decarboxylase deficient mutants and their relationship to the -methyl-dopa-byersensitive mutants. *Genetics* **84**, 287-310.
- Zipursky, S. L., Venkatesh, T. R., Teplow, D. B. and Benzer, S.** (1984). Neuronal development in the *Drosophila* retina: monoclonal antibodies as molecular probes. *Cell* **36**, 15-26.

(Accepted 30 October)
